# Supplementary material for: Synthesis of luminescent homo-dinuclear cationic lanthanide cyclen complexes bearing amide pendant arms through the use of copper catalysed (1,3-Huisgen, CuAAC) click chemistry
Source: Royal Society of Chemistry journal article supplement (doi:10.1039/c1ob06203d), 2011-09-27

# Synthesis of luminescent homo-dinuclear cationic lanthanide cyclen complexes bearing amide pendant arms through the use of copper catalysed (1,3-Huisgen) click chemistry

Jennifer K. Molloy, Oxana Kotova, Robert D. Peacock and Thorfinnur Gunnlaugsson

## Electronic Supporting Information

**Figure S1.** Isotopic distribution for **6Eu**: a) Observed and b) Calculated and **6Tb**: c) Observed and d) Calculated in MeOH in ESI<sup>+</sup>

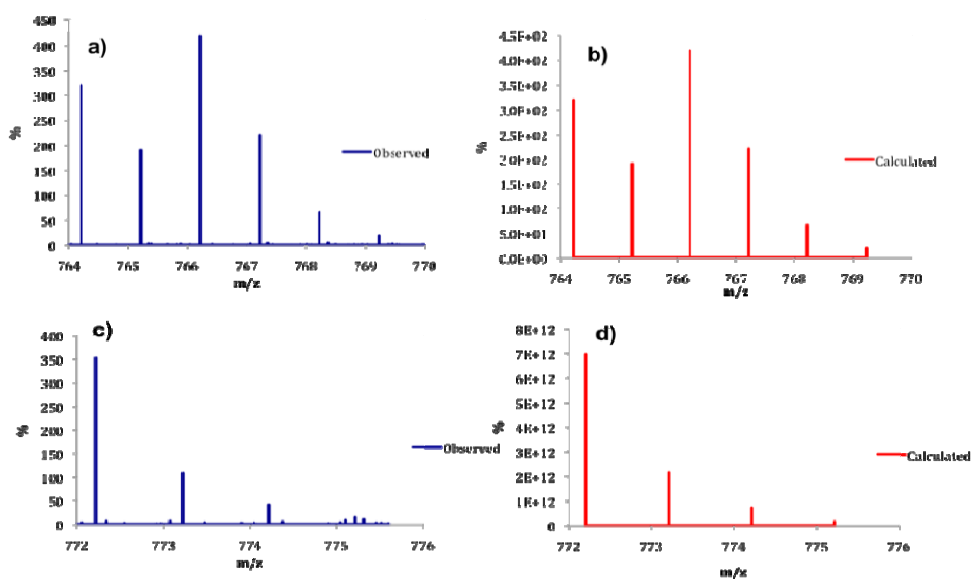

**Figure S2.** <sup>1</sup>H NMR spectrum (CDCl<sub>3</sub>, 400 MHz) of ligand **7**

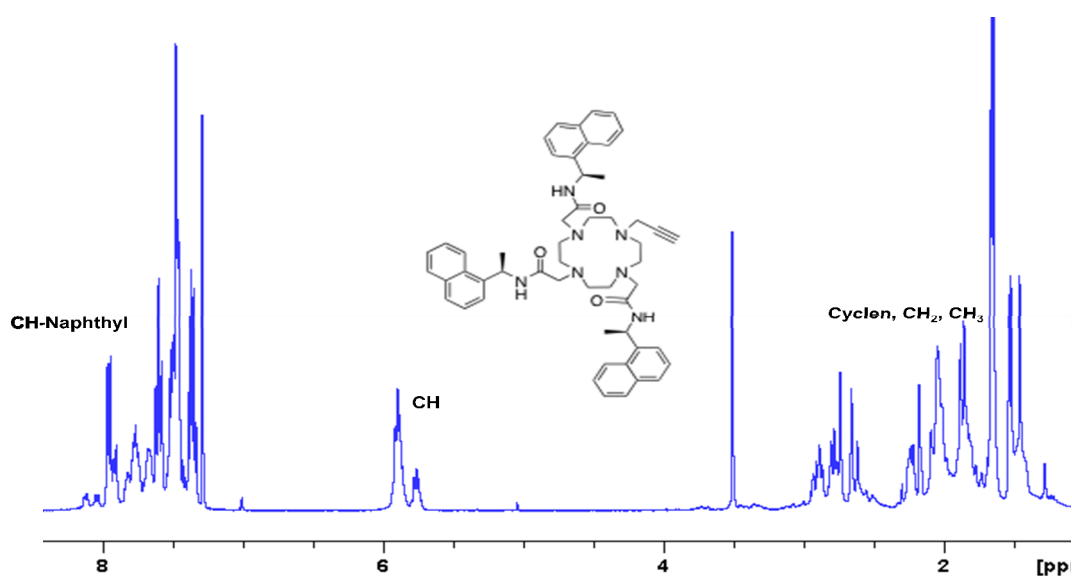

**Figure S3.** CD spectrum of **7** (Red) and **8** (Blue)

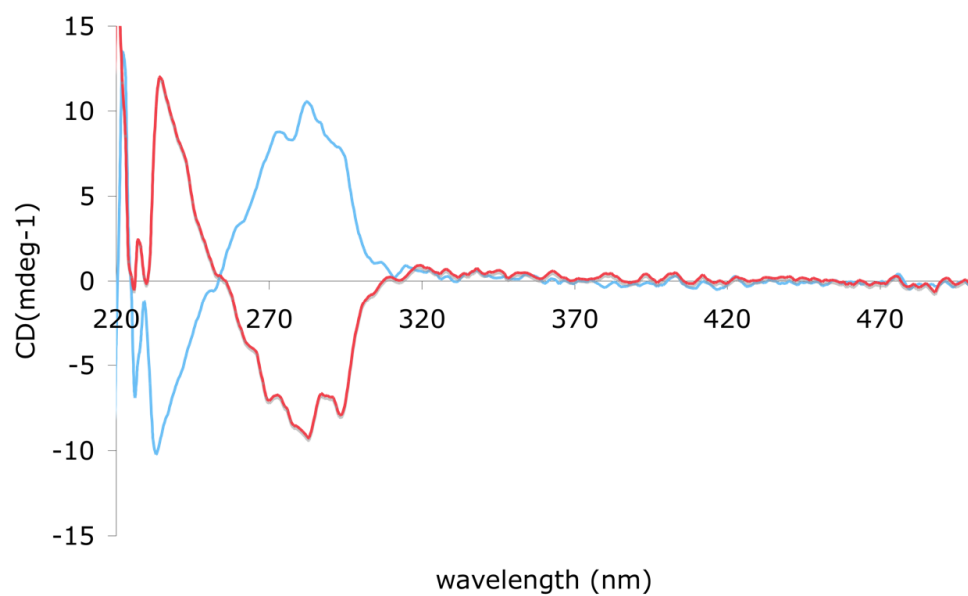

**Figure S4.** The  $^1\text{H}$  NMR spectrum (MeOD, 400 MHz) of complex **8Eu**

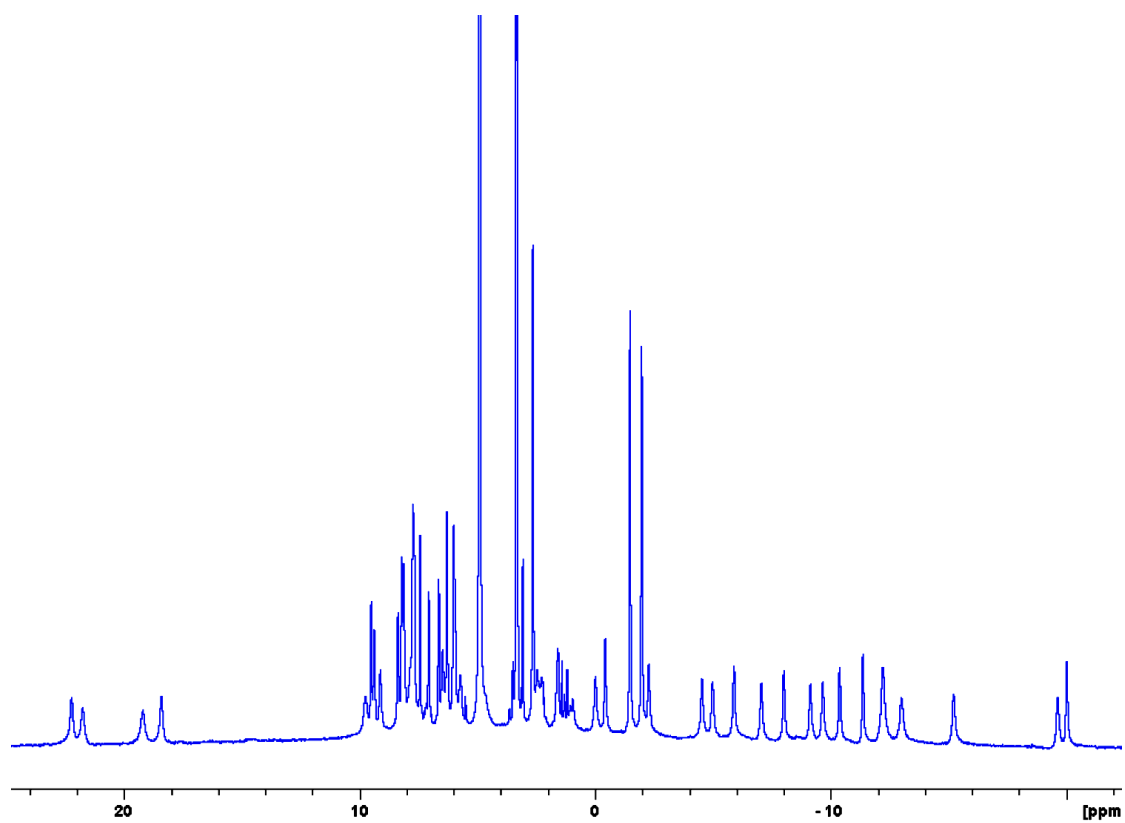

Figure S5. CD spectrum of 7Eu in MeOH

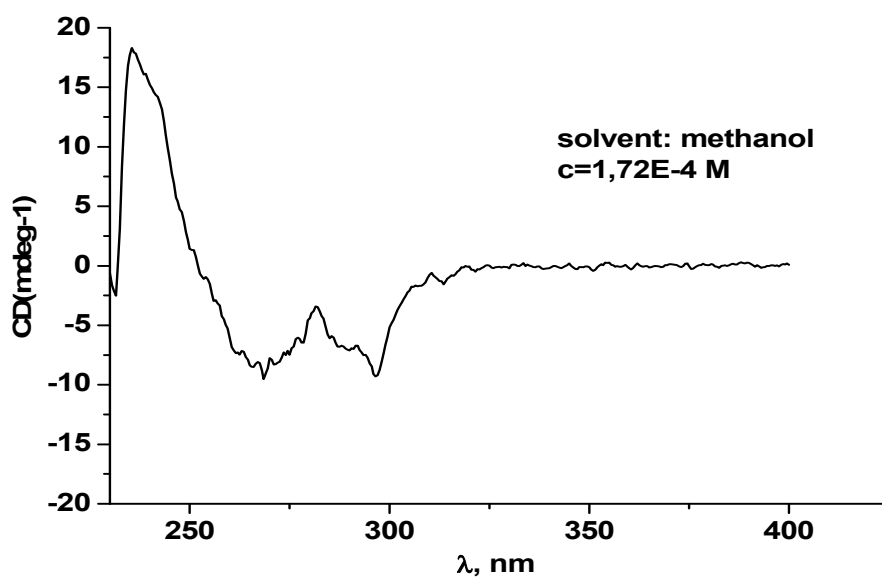

Figure S6. <sup>1</sup>H NMR (MeOD, 400 MHz) spectrum of 4Eu

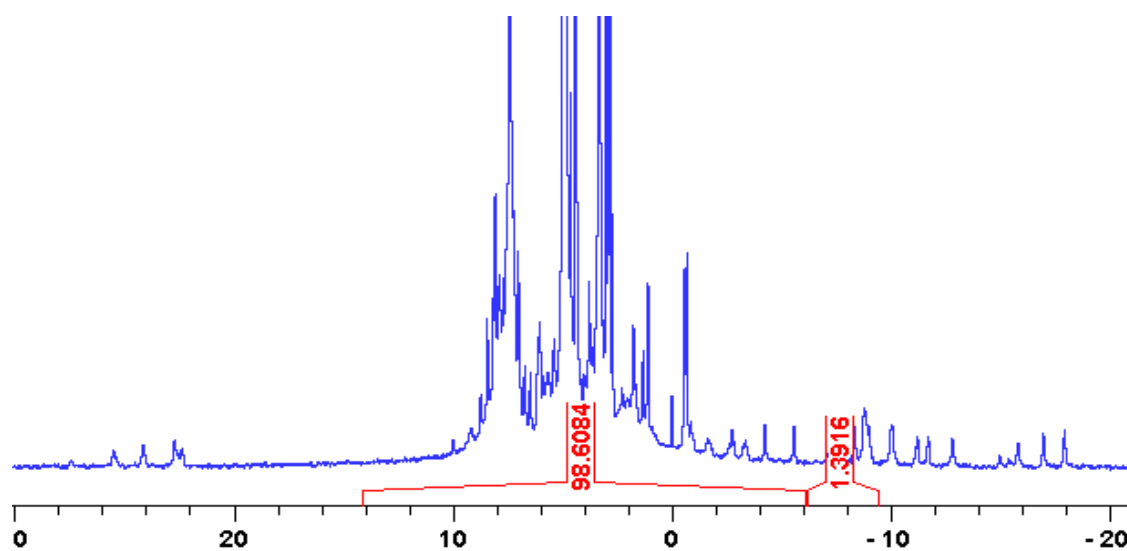

Supplement: c1ob06203d.pdf [file c1ob06203d.pdf]
